# Supplementary material for: Strategies and utility of imputed SNP genotypes for genomic analysis in dairy cattle
Source: PubMed Central journal article supplement (PMC3531262; doi:10.1186/1471-2164-13-538), 2012-10-08

# Imputation error vs. kinship (test with reference)

Mean allelic error rate (%) 

5 10 15

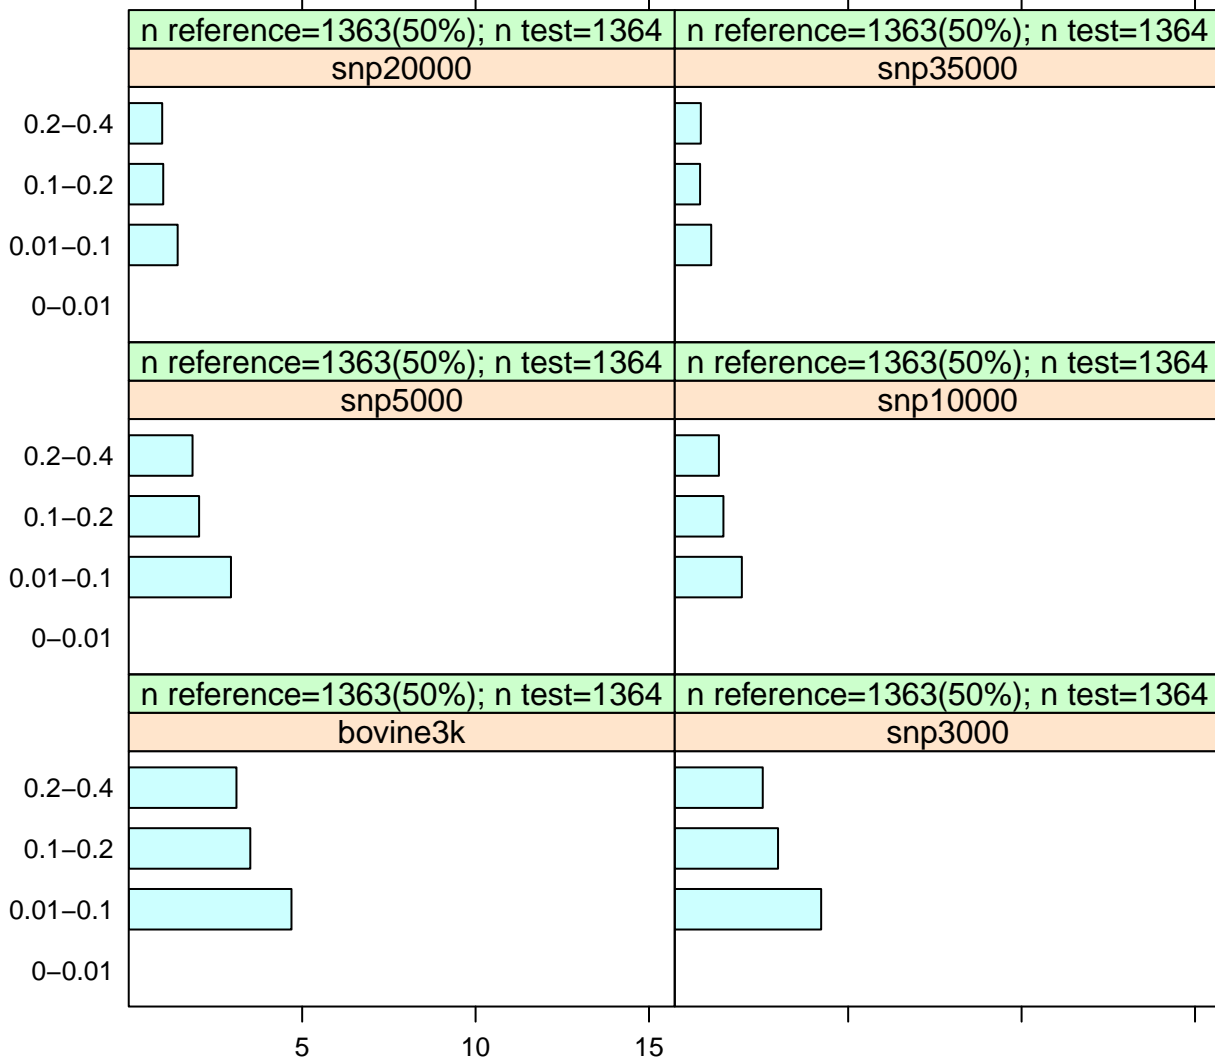

Mean allelic error rate (%)

Highest kinship of test animals with reference set

# Imputation error vs. kinship (test with reference)

Mean allelic error rate (%) 

5

10

15

n reference=681(25%); n test=2046

n reference=681(25%); n test=2046

snp20000

snp35000

0.2-0.4

0.1-0.2

0.01-0.1

0-0.01

n reference=681(25%); n test=2046

n reference=681(25%); n test=2046

snp5000

snp10000

0.2-0.4

0.1-0.2

0.01-0.1

0-0.01

n reference=681(25%); n test=2046

n reference=681(25%); n test=2046

bovine3k

snp3000

0.2-0.4

0.1-0.2

0.01-0.1

0-0.01

5

10

15

Mean allelic error rate (%)

Highest kinship of test animals with reference set

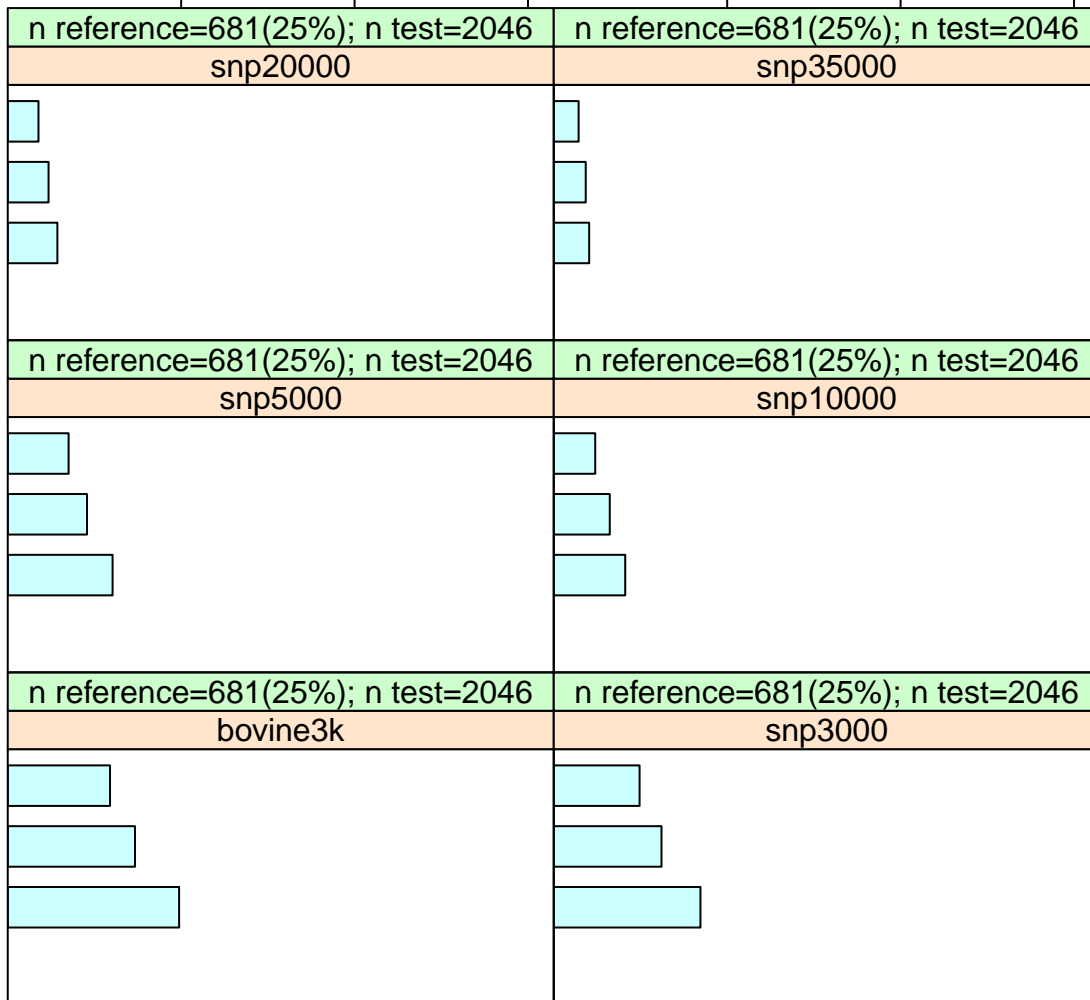

# Imputation error vs. kinship (test with reference)

Mean allelic error rate (%) 

5 10 15

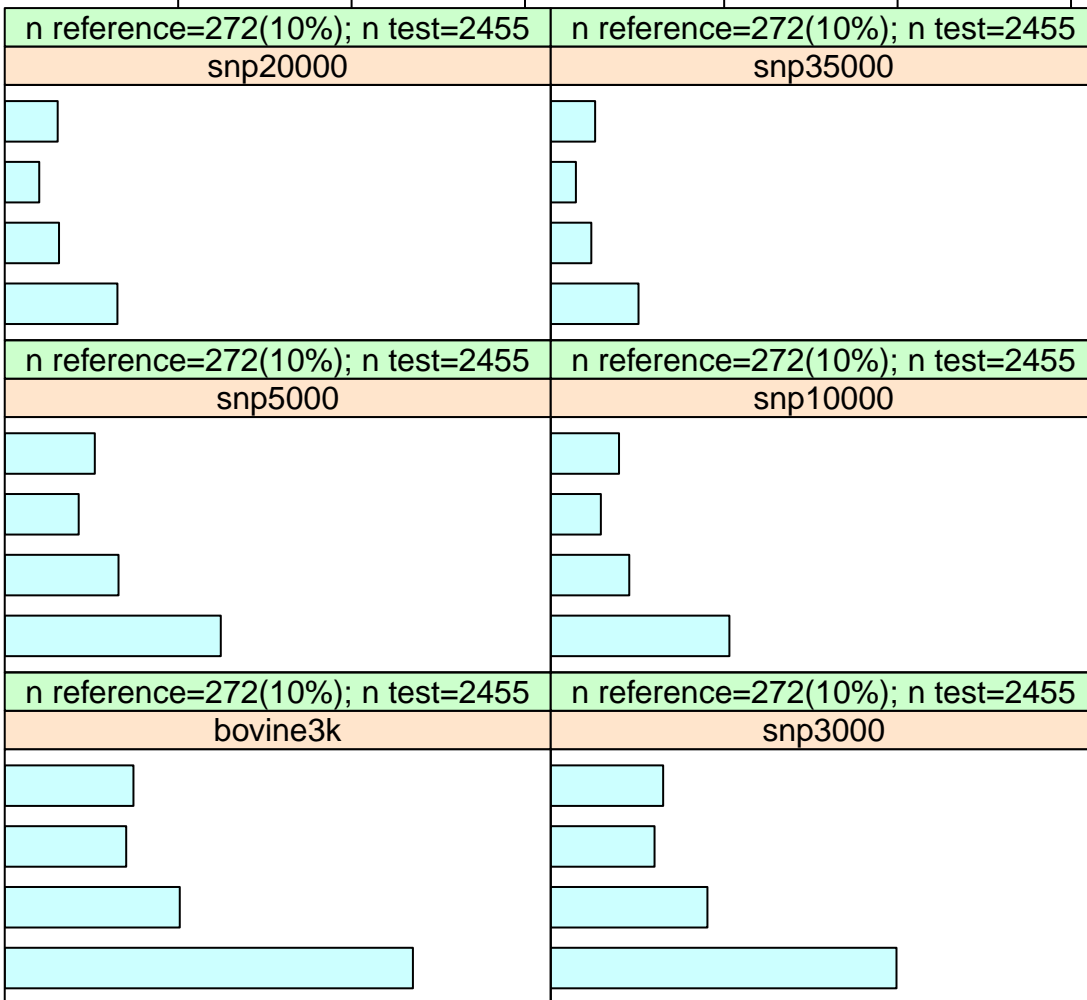

5 10 15

Mean allelic error rate (%)

Highest kinship of test animals with reference set

# Imputation error vs. kinship (test with reference)

Mean allelic error rate (%) 

5 10 15

Highest kinship of test animals with reference set

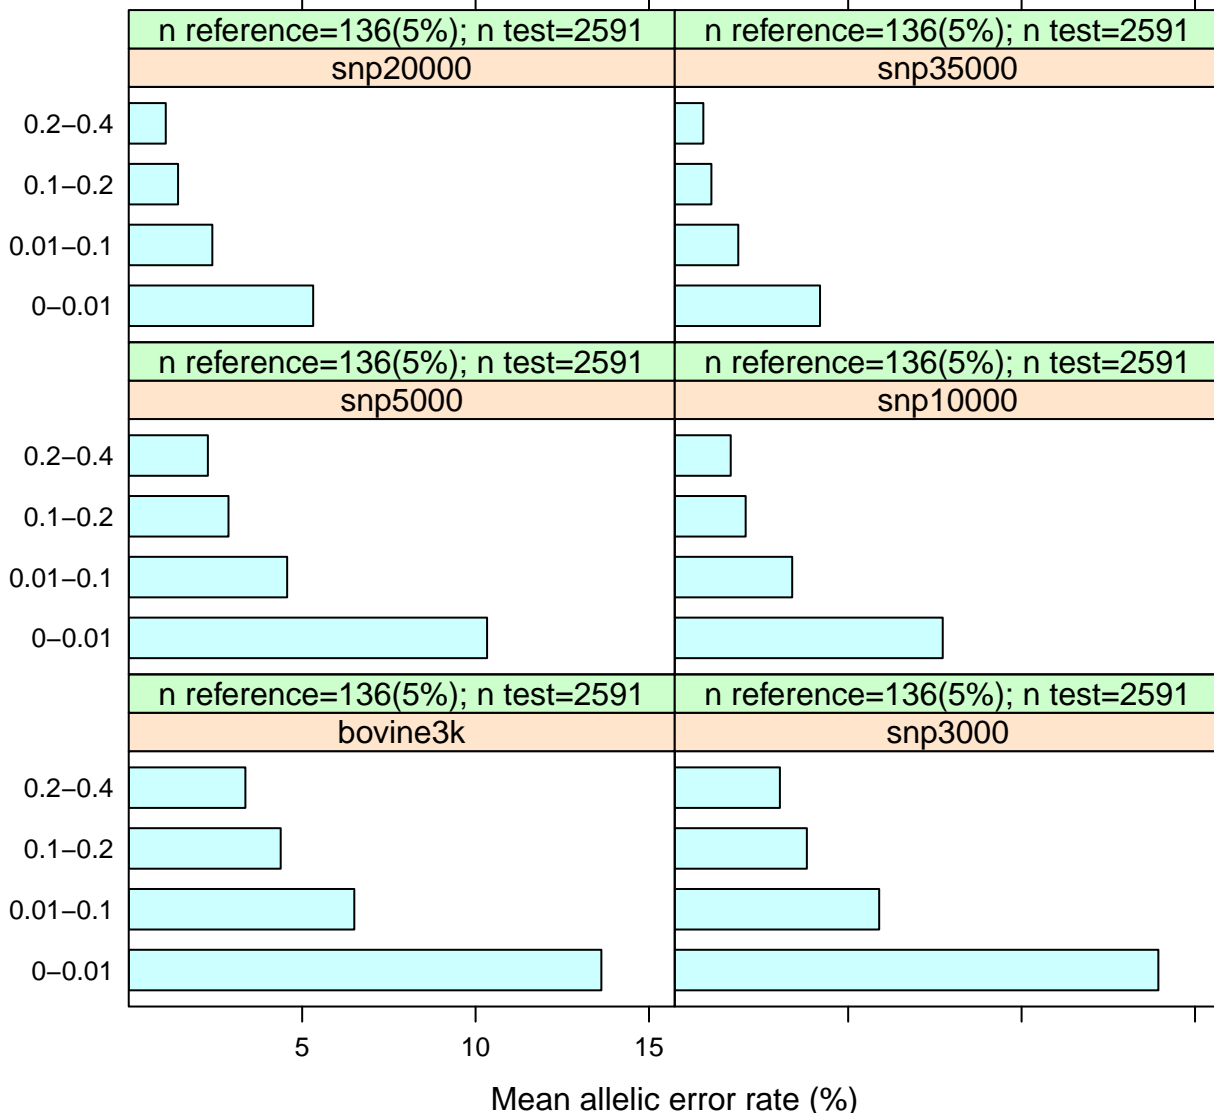

# Imputation error vs. kinship (test with reference)

Mean allelic error rate (%) 

5 10 15

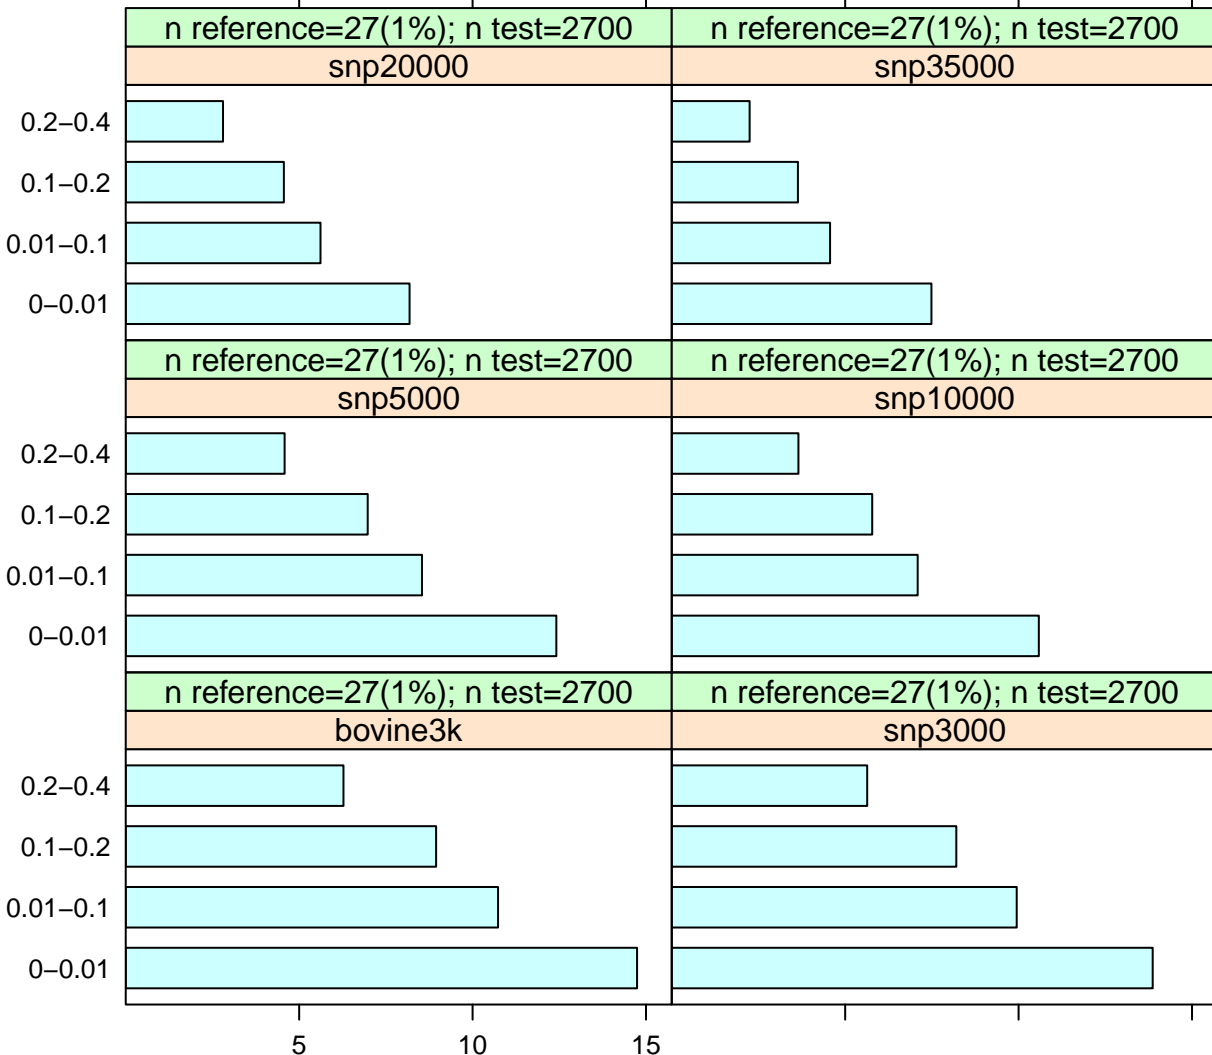

Mean allelic error rate (%)

Highest kinship of test animals with reference set

# Imputation error vs. kinship (test with reference)

Mean allelic error rate (%) 

5

10

15

reference=2205 bulls; test=522 cows

reference=2205 bulls; test=522 cows

snp20000

snp35000

0.2-0.4

0.1-0.2

0.01-0.1

0-0.01

reference=2205 bulls; test=522 cows

reference=2205 bulls; test=522 cows

snp5000

snp10000

0.2-0.4

0.1-0.2

0.01-0.1

0-0.01

reference=2205 bulls; test=522 cows

reference=2205 bulls; test=522 cows

bovine3k

snp3000

0.2-0.4

0.1-0.2

0.01-0.1

0-0.01

5

10

15

Mean allelic error rate (%)

Highest kinship of test animals with reference set

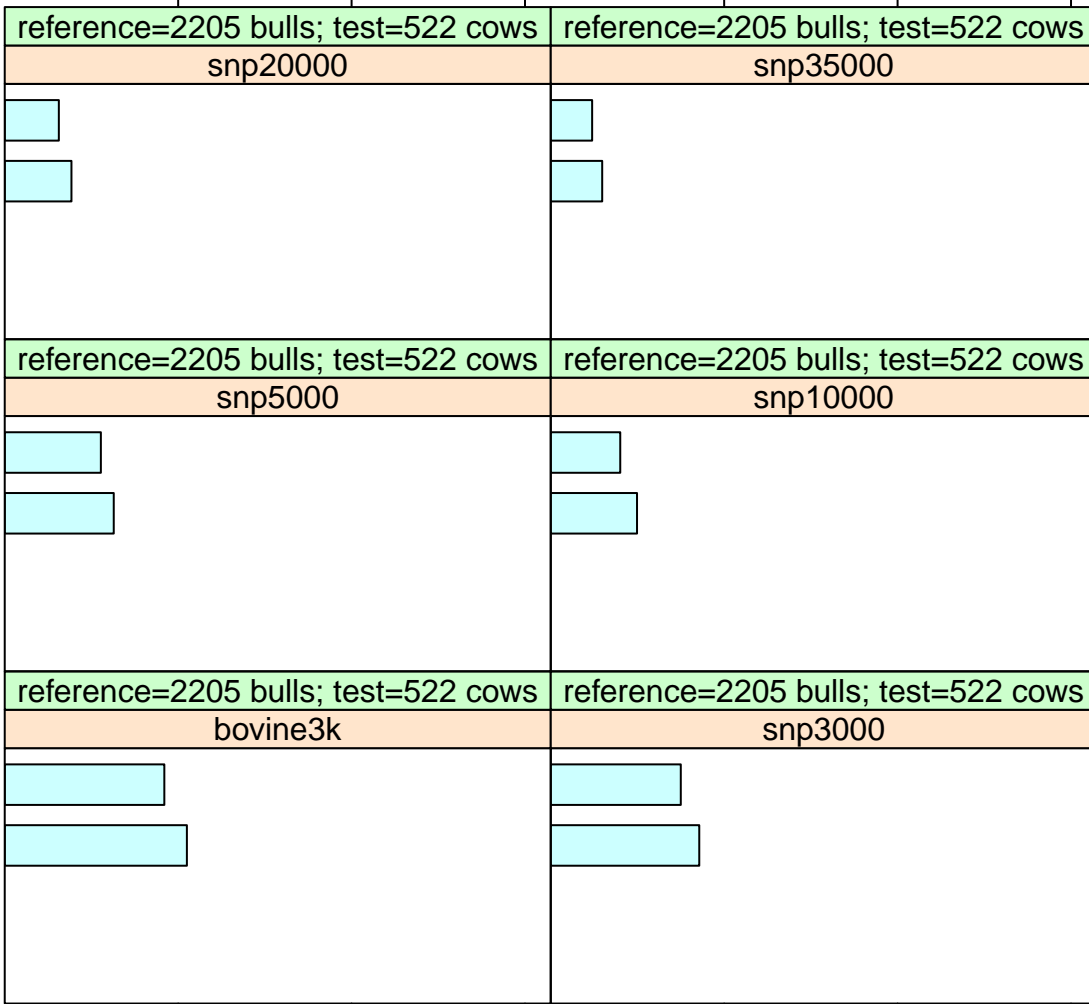

# Imputation error vs. kinship (test with reference)

Mean allelic error rate (%) 

5

10

15

reference=522 cows; test=2205 bulls

reference=522 cows; test=2205 bulls

snp20000

snp35000

0.2-0.4

0.1-0.2

0.01-0.1

0-0.01

reference=522 cows; test=2205 bulls

reference=522 cows; test=2205 bulls

snp5000

snp10000

0.2-0.4

0.1-0.2

0.01-0.1

0-0.01

reference=522 cows; test=2205 bulls

reference=522 cows; test=2205 bulls

bovine3k

snp3000

0.2-0.4

0.1-0.2

0.01-0.1

0-0.01

5

10

15

Mean allelic error rate (%)

Highest kinship of test animals with reference set

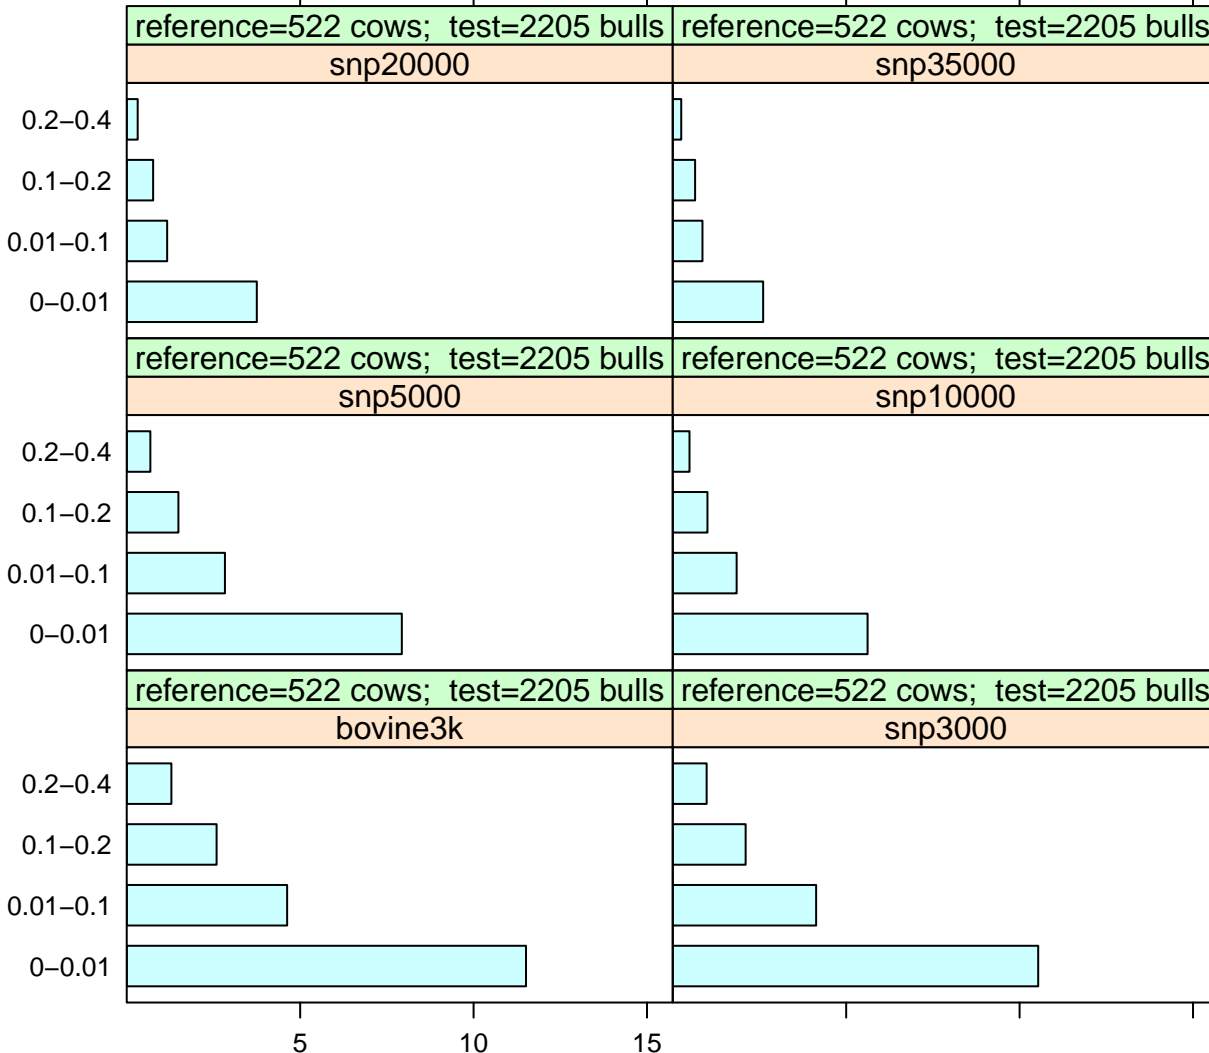

Supplement: 1471-2164-13-538-S3.pdf [file 1471-2164-13-538-S3.pdf]
